# Supplementary material for: Zero-field slow magnetic relaxation behavior of Zn2Dy in a family of trinuclear near-linear Zn2Ln complexes: synthesis, experimental and theoretical investigations
Source: Royal Society of Chemistry journal article supplement (doi:10.1039/d2dt00926a), 2022-01-01
Supplement: d2dt00926a1.pdf [file d2dt00926a1.pdf]

## Supporting Information

### Zero-Field Slow Magnetic Relaxation of Zn<sub>2</sub>Dy in a Family of Trinuclear Near Linear Zn<sub>2</sub>Ln Complexes: Synthesis, Experimental and Theoretical Investigations

Naushad Ahmed,<sup>\*a,b</sup> and Kamal Uddin Ansari <sup>a</sup>

<sup>a</sup> Dr. N. Ahmed and Dr. K. U. Ansari, Department of Chemistry, Indian Institute of Technology Bombay Powai, Mumbai-400076, Maharashtra, India. E-mail: naushad.chem@gmail.com (NA)

<sup>b</sup> Current address: Department of Chemistry, Indian Institute of Technology Hyderabad, Kandi, Sangareddy, Telangana 502285, India.

Email. naushad.chem@gmail.com

**Table S1.** Crystallographic information table for the complexes **1-La-6-Dy**

|                                             | <b>1-La</b>                                                                      | <b>2-Ce</b>                                                                      | <b>3-Nd</b>                                                                      | <b>4-Sm</b>                                                                      | <b>5-Tb</b>                                                                      | <b>6-Dy</b>                                                                      |
|---------------------------------------------|----------------------------------------------------------------------------------|----------------------------------------------------------------------------------|----------------------------------------------------------------------------------|----------------------------------------------------------------------------------|----------------------------------------------------------------------------------|----------------------------------------------------------------------------------|
| Identification code                         | Zn <sub>2</sub> Ce                                                               | Zn <sub>2</sub> La                                                               | Zn <sub>2</sub> Nd                                                               | Zn <sub>2</sub> Sm                                                               | Zn <sub>2</sub> Tb                                                               | Zn <sub>2</sub> Dy                                                               |
| Empirical formula                           | C <sub>63</sub> H <sub>63</sub> CeN <sub>6</sub> O <sub>21</sub> Zn <sub>2</sub> | C <sub>63</sub> H <sub>63</sub> LaN <sub>6</sub> O <sub>21</sub> Zn <sub>2</sub> | C <sub>62</sub> H <sub>59</sub> N <sub>6</sub> NdO <sub>20</sub> Zn <sub>2</sub> | C <sub>62</sub> H <sub>59</sub> N <sub>6</sub> O <sub>20</sub> SmZn <sub>2</sub> | C <sub>62</sub> H <sub>59</sub> N <sub>6</sub> O <sub>20</sub> TbZn <sub>2</sub> | C <sub>62</sub> H <sub>57</sub> DyN <sub>6</sub> O <sub>20</sub> Zn <sub>2</sub> |
| Formula weight                              | 1511.05                                                                          | 1509.84                                                                          | 1483.13                                                                          | 1489.24                                                                          | 1497.81                                                                          | 1499.37                                                                          |
| Temperature/K                               | 100.15                                                                           | 293(2)                                                                           | 150.00(10)                                                                       | 150.00(10)                                                                       | 273.15                                                                           | 150.00(10)                                                                       |
| Crystal system                              | triclinic                                                                        | triclinic                                                                        | triclinic                                                                        | triclinic                                                                        | triclinic                                                                        | monoclinic                                                                       |
| Space group                                 | P-1                                                                              | P-1                                                                              | P-1                                                                              | P-1                                                                              | P-1                                                                              | C2/c                                                                             |
| a/Å                                         | 12.693(3)                                                                        | 12.6542(8)                                                                       | 12.7538(3)                                                                       | 12.7211(10)                                                                      | 12.7840(16)                                                                      | 22.6246(16)                                                                      |
| b/Å                                         | 13.251(3)                                                                        | 13.2334(8)                                                                       | 13.2632(3)                                                                       | 13.1975(11)                                                                      | 13.1615(17)                                                                      | 12.9505(6)                                                                       |
| c/Å                                         | 21.930(6)                                                                        | 21.8815(9)                                                                       | 22.0875(3)                                                                       | 21.9778(12)                                                                      | 22.061(3)                                                                        | 24.2392(15)                                                                      |
| α/°                                         | 86.0000(10)                                                                      | 85.739(4)                                                                        | 85.715(2)                                                                        | 85.982(6)                                                                        | 85.513(4)                                                                        | 90                                                                               |
| β/°                                         | 87.6080(10)                                                                      | 87.260(4)                                                                        | 87.298(2)                                                                        | 87.403(5)                                                                        | 87.341(4)                                                                        | 111.889(7)                                                                       |
| γ/°                                         | 61.616(6)                                                                        | 61.849(6)                                                                        | 61.566(3)                                                                        | 61.234(9)                                                                        | 61.328(4)                                                                        | 90                                                                               |
| Volume/Å <sup>3</sup>                       | 3237.0(14)                                                                       | 3221.5(4)                                                                        | 3276.05(14)                                                                      | 3226.2(5)                                                                        | 3246.6(7)                                                                        | 6590.1(8)                                                                        |
| Z                                           | 2                                                                                | 2                                                                                | 2                                                                                | 2                                                                                | 2                                                                                | 4                                                                                |
| ρ <sub>calc</sub> /g/cm <sup>3</sup>        | 1.550                                                                            | 1.557                                                                            | 1.504                                                                            | 1.533                                                                            | 1.532                                                                            | 1.511                                                                            |
| μ/mm <sup>-1</sup>                          | 1.507                                                                            | 1.470                                                                            | 1.583                                                                            | 1.713                                                                            | 1.887                                                                            | 1.920                                                                            |
| F(000)                                      | 1538.0                                                                           | 1536.0                                                                           | 1506.0                                                                           | 1510.0                                                                           | 1516.0                                                                           | 3028.0                                                                           |
| Crystal size/mm <sup>3</sup>                | 0.14 × 0.12 × 0.1                                                                | 0.12 × 0.09 × 0.08                                                               | 0.032 × 0.025 × 0.021                                                            | 0.021 × 0.015 × 0.01                                                             | 0.25 × 0.034 × 0.021                                                             | 0.025 × 0.023 × 0.021                                                            |
| Radiation                                   | MoKα (λ = 0.7107)                                                                | MoKα (λ = 0.71073)                                                               | Mo Kα (λ = 0.71073)                                                              | Mo Kα (λ = 0.71073)                                                              | MoKα (λ = 0.71073)                                                               | Mo Kα (λ = 0.71073)                                                              |
| 2θ range for data collection/°              | 6.138 to 53.998                                                                  | 4.124 to 52.744                                                                  | 3.498 to 50                                                                      | 3.526 to 49.998                                                                  | 3.884 to 49.998                                                                  | 3.696 to 49.996                                                                  |
| Index ranges                                | -16 ≤ h ≤ 16, -16 ≤ k ≤ 16, -28 ≤ l ≤ 28                                         | -15 ≤ h ≤ 15, -16 ≤ k ≤ 16, -27 ≤ l ≤ 27                                         | -15 ≤ h ≤ 15, -15 ≤ k ≤ 15, -26 ≤ l ≤ 26                                         | -15 ≤ h ≤ 15, -15 ≤ k ≤ 15, -26 ≤ l ≤ 26                                         | -15 ≤ h ≤ 15, -15 ≤ k ≤ 15, -26 ≤ l ≤ 26                                         | -26 ≤ h ≤ 26, -15 ≤ k ≤ 15, -28 ≤ l ≤ 27                                         |
| Reflections collected                       | 44546                                                                            | 42177                                                                            | 141581                                                                           | 141092                                                                           | 93955                                                                            | 56161                                                                            |
| Independent reflections                     | 14085 [R <sub>int</sub> = 0.1054, R <sub>sigma</sub> = 0.1159]                   | 13160 [R <sub>int</sub> = 0.0687, R <sub>sigma</sub> = 0.0723]                   | 11530 [R <sub>int</sub> = 0.1016, R <sub>sigma</sub> = 0.0472]                   | 11347 [R <sub>int</sub> = 0.1933, R <sub>sigma</sub> = 0.0841]                   | 11448 [R <sub>int</sub> = 0.0583, R <sub>sigma</sub> = 0.0333]                   | 5801 [R <sub>int</sub> = 0.0920, R <sub>sigma</sub> = 0.0457]                    |
| Data/restraints/parameters                  | 14085/18/857                                                                     | 13160/12/857                                                                     | 11530/6/836                                                                      | 11347/6/839                                                                      | 11448/148/861                                                                    | 5801/49/418                                                                      |
| Goodness-of-fit on F <sup>2</sup>           | 1.150                                                                            | 1.057                                                                            | 1.044                                                                            | 1.042                                                                            | 1.022                                                                            | 1.037                                                                            |
| Final R indexes [I ≥ 2σ (I)]                | R <sub>1</sub> = 0.0717, wR <sub>2</sub> = 0.1303                                | R <sub>1</sub> = 0.0509, wR <sub>2</sub> = 0.1219                                | R <sub>1</sub> = 0.0433, wR <sub>2</sub> = 0.1015                                | R <sub>1</sub> = 0.0527, wR <sub>2</sub> = 0.1130                                | R <sub>1</sub> = 0.0337, wR <sub>2</sub> = 0.0751                                | R <sub>1</sub> = 0.0499, wR <sub>2</sub> = 0.1318                                |
| Final R indexes [all data]                  | R <sub>1</sub> = 0.0861, wR <sub>2</sub> = 0.1374                                | R <sub>1</sub> = 0.0683, wR <sub>2</sub> = 0.1359                                | R <sub>1</sub> = 0.0622, wR <sub>2</sub> = 0.1110                                | R <sub>1</sub> = 0.0867, wR <sub>2</sub> = 0.1277                                | R <sub>1</sub> = 0.0463, wR <sub>2</sub> = 0.0802                                | R <sub>1</sub> = 0.0664, wR <sub>2</sub> = 0.1443                                |
| Largest diff. peak/hole / e Å <sup>-3</sup> | 1.11/-1.03                                                                       | 0.62/-0.79                                                                       | 0.70/-0.78                                                                       | 0.65/-0.97                                                                       | 0.55/-0.58                                                                       | 1.05/-1.16                                                                       |

**Table S2.** Continuous Shape Measurement (CShM) analysis for Ln<sup>III</sup> sites in **1-La-6-Dy**

|                | 1-La         | 2-Ce         | 3-Nd         | 4-Sm         | 5-Tb         | 6-Dy         |
|----------------|--------------|--------------|--------------|--------------|--------------|--------------|
| DP-10          | 35.947       | 36.311       | 36.052       | 36.201       | 36.222       | 36.116       |
| EPY-10         | 23.939       | 24.142       | 23.978       | 24.109       | 23.976       | 23.984       |
| OBPY-10        | 11.684       | 15.093       | 14.971       | 14.867       | 14.767       | 14.905       |
| PPR-10         | 11.684       | 11.686       | 11.947       | 12.006       | 12.183       | 12.299       |
| PAPR-10        | 13.660       | 13.615       | 14.054       | 14.160       | 14.276       | 14.374       |
| JBCCU-10       | 13.912       | 13.981       | 13.834       | 13.679       | 13.646       | 13.363       |
| JBCSAPR-10     | 4.353        | 4.333        | 4.132        | 4.035        | 3.964        | 3.709        |
| JMBIC-10       | 8.399        | 8.536        | 8.504        | 8.644        | 8.620        | 8.684        |
| JATDI-10       | 16.755       | 16.966       | 16.920       | 17.079       | 17.309       | 17.283       |
| <b>JSPC-10</b> | <b>3.237</b> | <b>3.176</b> | <b>3.196</b> | <b>3.167</b> | <b>3.263</b> | <b>3.262</b> |
| SDD-10         | 5.299        | 5.198        | 5.411        | 5.396        | 5.513        | 5.546        |

**DP-10**  $D_{10h}$  Decagon, **EPY-10**  $C_{9v}$  Enneagonal pyramid, **OBPY-10**  $D_{8h}$  Octagonal bipyramid  
**PPR-10**  $D_{5h}$  Pentagonal prism, **PAPR-10**  $D_{5d}$  Pentagonal antiprism, **JBCCU-10**  $D_{4h}$  Bicapped cube J15  
**JBCSAPR-10**  $D_{4d}$  Bicapped square antiprism J17, **JMBIC-10**  $C_{2v}$  Metabidiminshed icosahedron J62  
**JATDI-10**  $C_{3v}$  Augmented tridiminshed icosahedron J64, **JSPC-10**  $C_{2v}$  Sphenocorona J87, **SDD-10**  $D_2$  Staggered Dodecahedron (2:6:2), **TD-10**  $C_{2v}$  Tetradecahedron (2:6:2), **HD-10**  $D_{4h}$  Hexadecahedron (2:6:2) or (1:4:4:1)

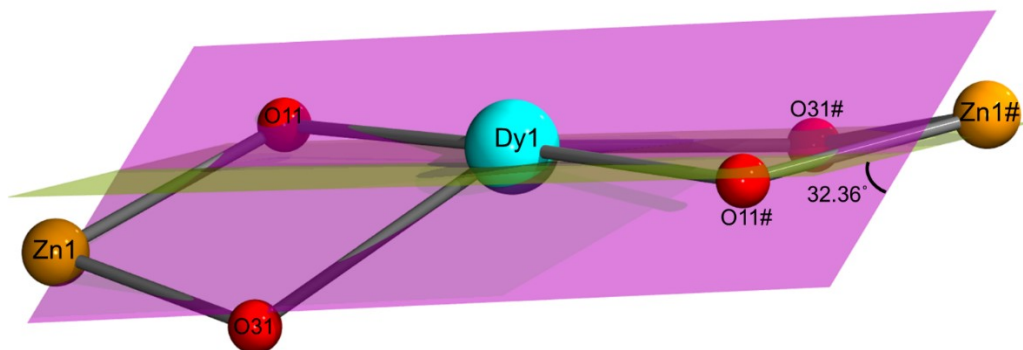

**Figure S1.** The twist between the two dihedral planes in **6-Dy**. The magenta and green planes consist of Zn1-O11-O31-Dy1 (plane 1) and Zn1#-O11#-O31#-Dy1 (plane 2) atoms respectively in **6-Dy**.

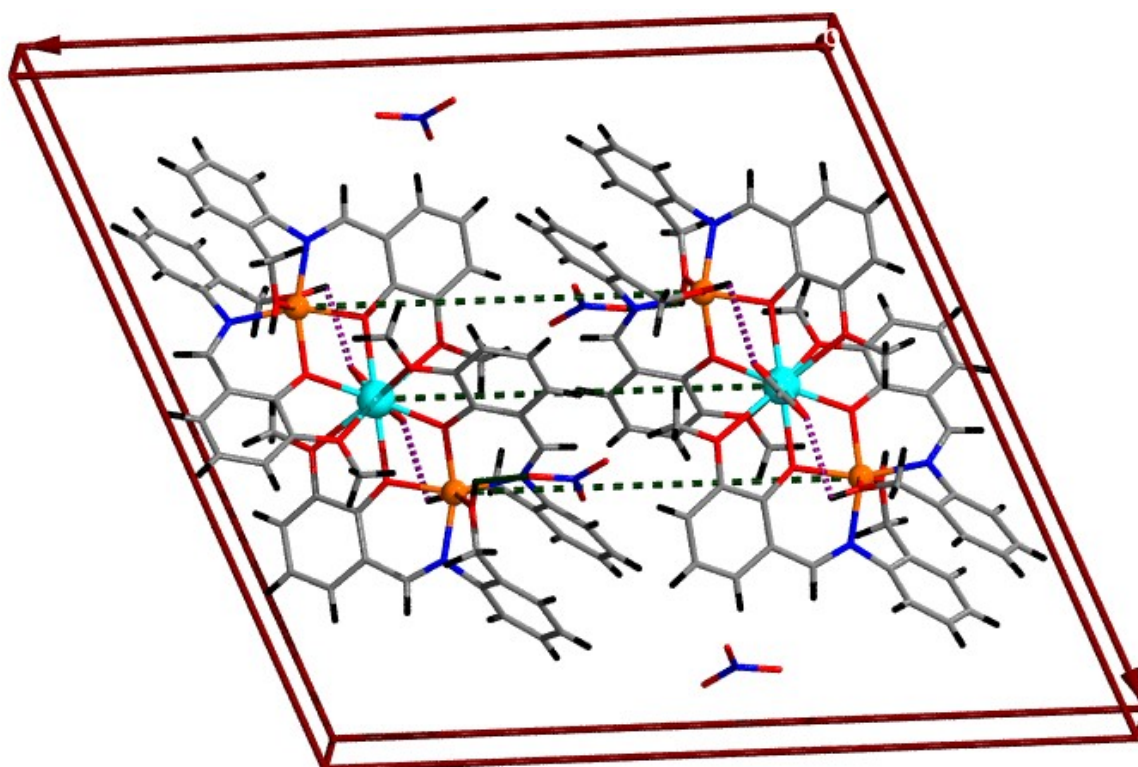

**Figure S2.** Packing structure of complex **6<sub>Dy</sub>** projected along b-axis. Color code: Cyan = Dy<sup>3+</sup>, orange = Zn<sup>2+</sup>, red = O, blue = N, grey = C and black = H.

**Table S3.** Selected bond lengths and bond angle parameters for complexes **1-La-6-Dy**.

|                                                                            | <b>1-La</b> | <b>2-Ce</b> | <b>3-Nd</b> | <b>4-Sm</b> | <b>5-Tb</b> | <b>6-Dy</b> |
|----------------------------------------------------------------------------|-------------|-------------|-------------|-------------|-------------|-------------|
| <b>Bond length (Å)</b>                                                     |             |             |             |             |             |             |
| Zn1-O11                                                                    | 2.042(4)    | 2.068(5)    | 2.095(3)    | 2.061(3)    | 2.049(2)    | 2.046(3)    |
| Zn2-O51                                                                    | 2.002(4)    | 2.016(4)    | 2.044(2)    | 2.044(3)    | 2.018(3)    | ----        |
| Zn1-O13                                                                    | 2.252(4)    | 2.262(4)    | 2.216(3)    | 2.331(3)    | 2.187(3)    | 2.340(4)    |
| Zn2-O53                                                                    | 2.225(4)    | 2.227(4)    | 2.036(3)    | 2.280(3)    | 2.186(3)    | -----       |
| Zn1-O31                                                                    | 2.019(4)    | 2.040(4)    | 2.060(2)    | 2.016(3)    | 2.043(3)    | 2.030(3)    |
| Zn2-O71                                                                    | 2.047(4)    | 2.075(4)    | 2.044(2)    | 2.027(3)    | 2.029(4)    | ----        |
| Zn1-O33                                                                    | 2.283(4)    | 2.286(4)    | 2.328(3)    | 2.219(3)    | 2.229(3)    | 2.234(-3)   |
| Zn2-O73                                                                    | 2.309(4)    | 2.227(4)    | 2.277(3)    | 2.271(3)    | 2.287(4)    | -----       |
| Zn1-N11                                                                    | 2.039(5)    | 2.045(5)    | 2.081(6)    | 2.036(4)    | 2.054(3)    | 2.039(4)    |
| Zn2-N51                                                                    | 2.082(5)    | 2.045(5)    | 2.043(3)    | 2.044(3)    | 2.097(3)    | ----        |
| Zn1-N31                                                                    | 2.071(5)    | 2.048(6)    | 2.036(3)    | 2.090(4)    | 2.084(3)    | 2.070(4)    |
| Zn2-N71                                                                    | 2.025(5)    | 2.048(6)    | 2.072(3)    | 2.044(3)    | 2.046(3)    | -----       |
| Ln1-O11                                                                    | 2.562(4)    | 2.544(4)    | 2.653(3)    | 2.469(3)    | 2.054(3)    | 2.461(4)    |
| Ln1-O12                                                                    | 2.687(4)    | 2.694(5)    | 2.596(3)    | 2.634(3)    | 2.590(3)    | 2.625(3)    |
| Ln1-O31                                                                    | 2.428(4)    | 2.412(4)    | 2.492(2)    | 2.363(3)    | 2.695(3)    | 2.311(3)    |
| Ln1-O32                                                                    | 2.710(4)    | 2.708(4)    | 2.642(2)    | 2.631(3)    | 2.439(2)    | 2.599(3)    |
| Ln1-O51                                                                    | 2.431(4)    | 2.416(4)    | 2.518(2)    | 2.495(3)    | 2.717(3)    |             |
| Ln1-O52                                                                    | 2.689(4)    | 2.676(4)    | 2.660(2)    | 2.643(3)    | 2.443(2)    |             |
| Ln1-O71                                                                    | 2.523(4)    | 2.512(4)    | 2.386(2)    | 2.644(3)    | 2.679(3)    |             |
| Ln1-O72                                                                    | 2.663(4)    | 2.677(4)    | 2.674(2)    | 2.357(3)    | 2.552(3)    |             |
| Ln1-O92                                                                    | 2.556(4)    | 2.566(5)    | 2.518(3)    | 2.488(3)    | 2.572(3)    | 2.435(3)    |
| Ln1-O93                                                                    | 2.579(4)    | 2.459(4)    | 2.521(3)    | 2.493(3)    | 2.585(3)    |             |
| <b>Bond angle (°)</b>                                                      |             |             |             |             |             |             |
| Zn1-O11-Ln1                                                                | 105.55(11)  | 105.77(11)  | 105.51(19)  | 106.67(18)  | 106.91(9)   | 106.24(9)   |
| Zn2-O51-Ln1                                                                | 112.030(9)  | 112.02(9)   | 111.61(10)  | 112.30(12)  | 112.27(9)   | -----       |
| Zn1-O31-Ln1                                                                | 111.290(9)  | 112.59(12)  | 112.47(10)  | 112.29(19)  | 110.92(9)   | 112.52(10)  |
| Zn2-O71-Ln1                                                                | 106.97(13)  | 106.87(13)  | 106.15(10)  | 106.23(19)  | 106.56(9)   | ----        |
| <b>Dihedral angle(°)</b>                                                   |             |             |             |             |             |             |
| O31-Zn1-O11-Ln1                                                            | 14.47(10)   | 14.20(10)   | 15.040(2)   | 13.96(20)   | 14.01(9)    | 14.85(16)   |
| O71-Zn2-O51-Ln1                                                            | 14.01(12)   | 14.09(12)   | 14.130(2)   | 13.82(20)   | 13.70(9)    | -----       |
| <b>The twist angle between the two dihedral planes mentioned above (°)</b> |             |             |             |             |             |             |
|                                                                            | 30.51(11)   | 30.50(10)   | 31.493(2)   | 31.164(4)   | 29.57(6)    | 32.36(13)   |
| <b>Intramolecular interatomic distance (Å)</b>                             |             |             |             |             |             |             |
| Zn1-Ln1                                                                    | 3.679       | 3.689       | 3.66(1)     | 3.66(10)    | 3.699(4)    | 3.613(12)   |
| Zn2-Ln1                                                                    | 3.684       | 3.693       | 3.65(1)     | 3.682(10)   | 3.771(4)    | -----       |
| Zn1-Zn2                                                                    | 7.339       | 7.539       | 7.29(2)     | 7.348(20)   | 7.388(8)    | 7.203(23)   |

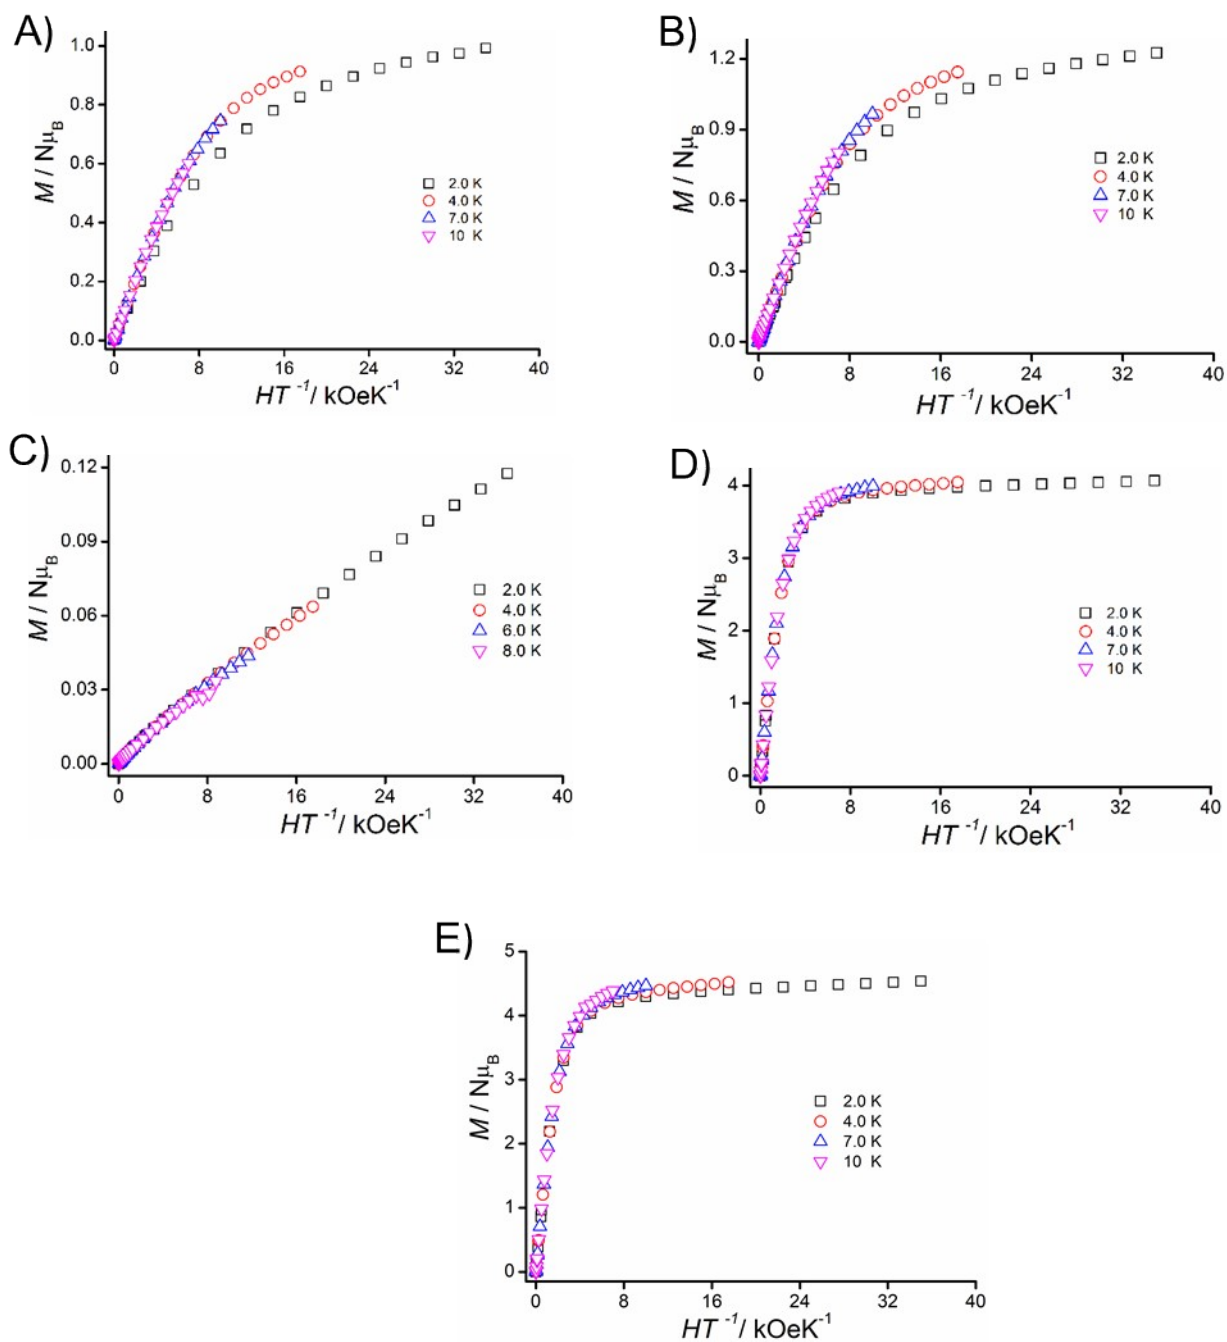

**Figure S3.** Reduced magnetization curves A-E for complexes **2**, **Ce**, **6**, **Dy**, respectively.

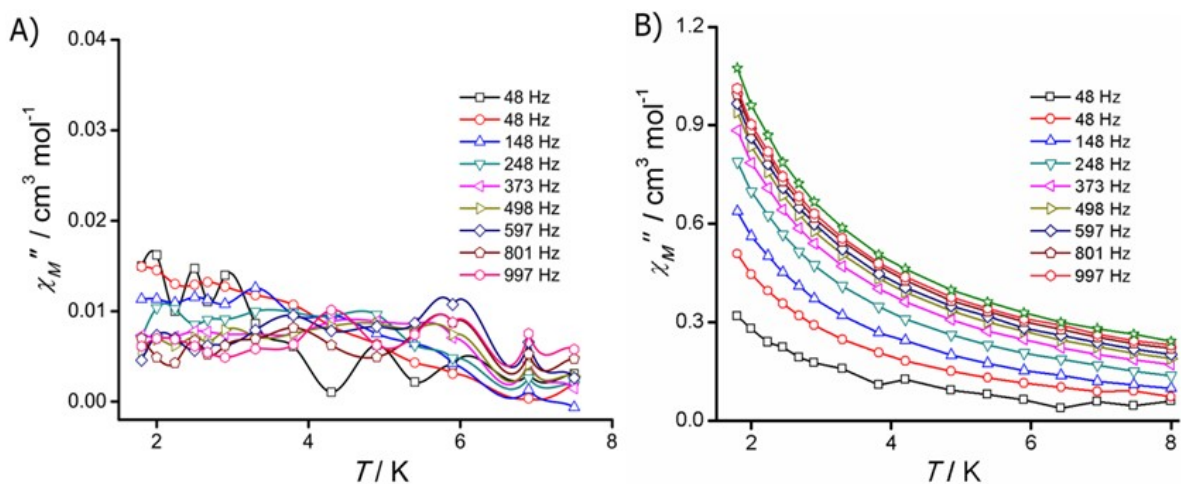

**Figure S4.** Alternating current out of phase magnetic susceptibility measurement performed at zero dc bias magnetic field and 3.5 Oe oscillating ac field for complexes **2**-Ce (A) and **5**-Tb (B) respectively.

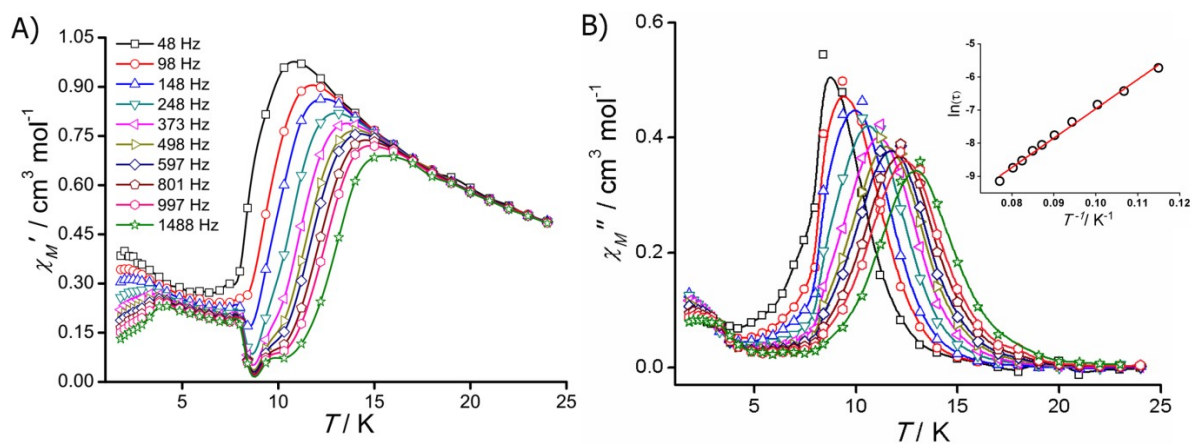

**Figure S5.** Alternating current magnetic susceptibility measurement at 2 kOe dc field and 3.5 Oe oscillating field for **6**-Dy. The frequency dependent in-phase and out-of-phase signals (A-B) respectively. Inset in panel B shows the Arrhenius fit to extract the energy barrier.

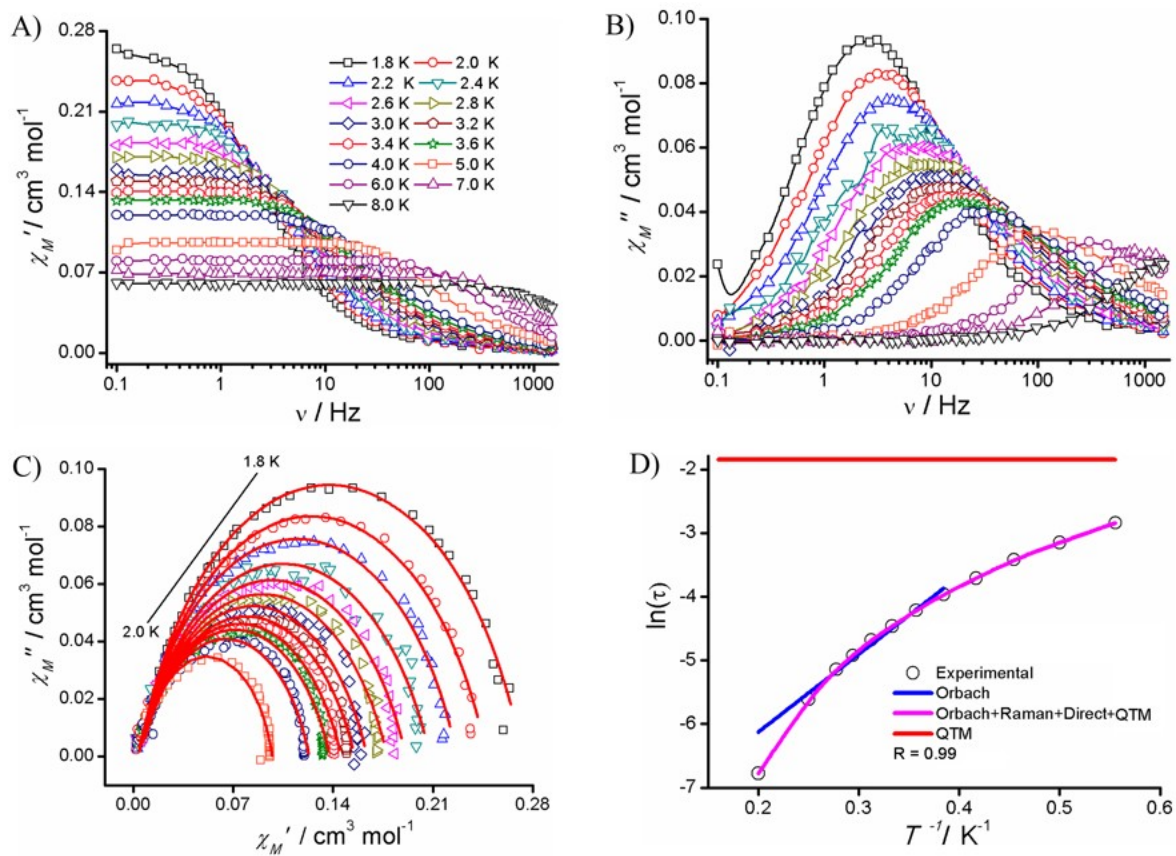

**Figure S6.** Alternating current magnetic susceptibility measurement at 2.0 kOe dc field and 3.5 Oe oscillating field for complex  $2_{\text{Ce}}$ . The frequency dependent in-phase and out-of-phase signals (A and B), Cole-Cole plot (C) and Arrhenius plot constructed from  $\tau$  value obtained from Cole-Cole fit (D). Solid lines represent the fit with parameter describe in the text.



**Table S4.** Reported Zn<sub>2</sub>Dy single-molecule magnets. If field applied it is given in the parenthesis.

| S. No | Complex                                                                                                                                          | $U_{eff}$ (cm <sup>-1</sup> )(Oe) | $\tau_0$ (s)                                                     | References       |
|-------|--------------------------------------------------------------------------------------------------------------------------------------------------|-----------------------------------|------------------------------------------------------------------|------------------|
| 1     | [Dy(ZnL) <sub>2</sub> (CH <sub>3</sub> COO)Cl <sub>2</sub> ] $\cdot$ CH <sub>2</sub> Cl <sub>2</sub> <sup>a</sup>                                | 13.2(700)                         | 9.1 $\times$ 10 <sup>-6</sup>                                    | <b>1</b>         |
| 2     | [(LZn(H <sub>2</sub> O)) <sub>2</sub> Dy(H <sub>2</sub> O)](CF <sub>3</sub> SO <sub>3</sub> ) <sup>b</sup>                                       | 68.5<br>91.8                      | 2.4 $\times$ 10 <sup>-7</sup><br>1.8 $\times$ 10 <sup>-8</sup>   | <b>2</b>         |
| 3     | [(LZnBr) <sub>2</sub> Dy(H <sub>2</sub> O)](ClO <sub>4</sub> ) <sup>b</sup>                                                                      | 104.8<br>153.3                    | 9.2 $\times$ 10 <sup>-8</sup><br>9.8 $\times$ 10 <sup>-9</sup>   | <b>2</b>         |
| 4     | [(LZnCl) <sub>2</sub> Dy(H <sub>2</sub> O)](ClO <sub>4</sub> ) $\cdot$ 1.25MeOH <sup>b</sup>                                                     | 104.3<br>144.6                    | 9.9 $\times$ 10 <sup>-9</sup><br>1.5 $\times$ 10 <sup>-8</sup>   | <b>2</b>         |
| 5     | [Zn <sub>2</sub> (L <sub>1</sub> ) <sub>2</sub> DyCl <sub>3</sub> ] $\cdot$ 2H <sub>2</sub> O <sup>c</sup>                                       | 307.1<br>343.6 (1000)             | 7.4 $\times$ 10 <sup>-11</sup><br>1.3 $\times$ 10 <sup>-11</sup> | <b>3</b>         |
| 6     | [Zn <sub>2</sub> (L <sub>1</sub> ) <sub>2</sub> Dy(MeOH)Br <sub>3</sub> ] $\cdot$ 3H <sub>2</sub> O <sup>c</sup>                                 | 166.4                             | 2.5 $\times$ 10 <sup>-8</sup>                                    | <b>3</b>         |
| 7     | [Zn <sub>2</sub> (L <sub>1</sub> ) <sub>2</sub> Dy(H <sub>2</sub> O)Br <sub>2</sub> ] $\cdot$ [ZnBr <sub>4</sub> ] <sub>0.5</sub> <sup>c</sup>   | 86.4                              | 8.5 $\times$ 10 <sup>-7</sup>                                    | <b>3</b>         |
| 8     | [Zn <sub>2</sub> (L <sub>2</sub> ) <sub>2</sub> DyCl <sub>3</sub> ] $\cdot$ 2H <sub>2</sub> O <sup>c</sup>                                       | 284.3                             | 3.5 $\times$ 10 <sup>-10</sup>                                   | <b>3</b>         |
| 9     | [DyZn <sub>2</sub> (Hhms) <sub>2</sub> (C <sub>6</sub> H <sub>5</sub> COO) <sub>4</sub> ] $\cdot$ C <sub>6</sub> H <sub>5</sub> COO <sup>e</sup> | 8.7 (500)                         | 1.01 $\times$ 10 <sup>-6</sup>                                   | <b>4</b>         |
| 10    | [Zn <sub>2</sub> Dy(L <sub>1</sub> ) <sub>2</sub> (OAc) <sub>4</sub> ](NO <sub>3</sub> ) <sub>0.93</sub> B <sub>0.08</sub> <sup>f</sup>          | 25 (3000)                         | 5.28 $\times$ 10 <sup>-8</sup>                                   | <b>5</b>         |
| 11    | [Zn <sub>2</sub> Dy(L <sub>1</sub> ) <sub>2</sub> (OAc) <sub>4</sub> ]ClO <sub>4</sub> <sup>f</sup>                                              | 12.09 (1000)                      | 5.8 $\times$ 10 <sup>-9</sup>                                    | <b>5</b>         |
| 12    | [Zn <sub>2</sub> Dy(L <sub>1</sub> ) <sub>2</sub> (OAc) <sub>4</sub> ]Cl <sup>f</sup>                                                            | 14.08 (1000)                      | 3.0 $\times$ 10 <sup>-8</sup>                                    | <b>5</b>         |
| 13    | [Zn <sub>2</sub> Dy(L <sub>1</sub> ) <sub>2</sub> (OAc) <sub>4</sub> ]PF <sub>6</sub> <sup>f</sup>                                               | 55.5 (1000)                       | 1.0 $\times$ 10 <sup>-10</sup>                                   | <b>5</b>         |
| 14    | [Zn <sub>2</sub> Ln(HL) <sub>4</sub> (NO <sub>3</sub> )] $\cdot$ (NO <sub>3</sub> ) <sub>2</sub>                                                 | 30.37                             | 2.42 $\times$ 10 <sup>-6</sup>                                   | <b>This Work</b> |

<sup>a</sup>H<sub>2</sub>L=N,N'- bis(3-ethoxysalicylidene)phenylene-1,2-diamine, <sup>b</sup>L= N,N'-2,2 dimethylpropylenedi(3-methoxysalicylideneiminato), <sup>c</sup>H<sub>2</sub>L<sub>2</sub>=N,N'-bis(3 methoxysalicylidene)-1,2-diaminocyclohexane, <sup>d</sup>H<sub>3</sub>L=6,6'-(((2-(5-bromo-2-hydroxy-3 methoxyphenyl)imidazolidine-1,3-diyl)bis(ethane-2,1 diyl))bis(azanylylidene))bis(methanylylidene))bis(4-bromo-2-methoxyphenol), <sup>e</sup>H<sub>2</sub>hms(2 hydroxy-3-methoxybenzylidene)-semicarbazide, <sup>f</sup>L<sub>1</sub>= 2-methoxy-6-(((2 methoxyphenyl)imino)methyl)phenol.



## Computational Details

The *ab initio* calculations were performed on the X-ray structures of the complexes **2<sub>Ce</sub>**-**6<sub>Dy</sub>** using MOLCAS 8.0 code. We have computed single-ion property of the lanthanide paramagnetic centre. In the complete active space self-consistent field (CASSCF) method we have considered the 1, 3, 5, 8 and 9 active electron(s) of Ce<sup>3+</sup> (CAS(1,7)), Nd<sup>3+</sup>(CAS(3,7)), Sm<sup>3+</sup>(CAS(5,7)), Tb<sup>3+</sup>(CAS(8,7)) and Dy<sup>3+</sup>(CAS(9,7)) ion respectively spanning in seven *f*-orbitals orbitals. Under the configuration integration method we have computed spin-free energy of the 7 doublets (for Ce<sup>3+</sup>), 112 doublets and 35 quartets (for Nd<sup>3+</sup>), 224 quartets and 21 sextets (for Sm<sup>3+</sup> and Dy<sup>3+</sup>) and 140 quintets and 7 heptets (for Tb<sup>3+</sup>) excited states respectively in complexes **2<sub>Ce</sub>**-**6<sub>Dy</sub>**. The computed spin-free states were mixed in the spin-orbit restricted active space state interaction (SO-RASSI) step to obtain spin-orbit states. Due to the hardware limitation we have mixed only limited number of excited roots (128 quartets + 21 sextets) and (108 quartets + 21 sextets) for Sm<sup>3+</sup> and Dy<sup>3+</sup> respectively in the case of complexes **4<sub>Sm</sub>** and **6<sub>Dy</sub>**. Finally SINGLE\_ANISO module used to compute the g-tensors, dc magnetic property and *ab initio* energy barrier for magnetic relaxation.

**Table S5.** Basis set used for elements for ab initio calculations using MOLCAS 8.0 program.

| Element | Basis set               |
|---------|-------------------------|
| C       | ANO-RCC...3s2p.         |
| H       | ANO-RCC...2s.           |
| N , O   | ANO-RCC...3s2p1d.       |
| Zn      | ANO-RCC...5s4p2d.       |
| Ln      | ANO-RCC...8s7p5d3f2g1h. |

**Table S6.** The CASSCF computed energy (cm<sup>-1</sup>) of the spin-free states for complex **2-Ce** - **4-Sm**. The red values represent the 7 doublets (for Ce) , 35 quartets (for Nd) and 21 sextets (for Sm) respectively. The grey values represent 112 doublets (for Nd) and 224 quartets (for Sm) respectively.

| <b>2-Ce</b> | <b>3-Nd</b> |           |           |           | <b>4-Sm</b> |           |           |            |            |           |
|-------------|-------------|-----------|-----------|-----------|-------------|-----------|-----------|------------|------------|-----------|
| 0.000       | 0.000       | 19291.140 | 35539.442 | 87403.419 | 0.000       | 23171.638 | 28332.184 | 40883.343  | 69038.107  | 95261.460 |
| 46.366      | 21.444      | 19318.329 | 35675.163 | 87539.457 | 28.249      | 23194.691 | 28337.061 | 40922.107  | 69045.545  | 95316.848 |
| 214.810     | 66.975      | 19337.316 | 35677.562 | 87866.289 | 203.781     | 23199.034 | 28342.807 | 40945.422  | 69046.060  | 95463.275 |
| 304.021     | 69.164      | 19406.789 | 35806.318 |           | 250.160     | 23204.476 | 28355.142 | 40977.206  | 69096.372  | 95482.303 |
| 484.100     | 240.944     | 19418.158 | 35817.639 |           | 318.263     | 23225.052 | 28357.557 | 40992.959  | 69101.64   | 95490.975 |
| 625.810     | 254.662     | 19517.408 | 35952.583 |           | 587.425     | 23263.797 | 29870.959 | 51084.646  | 69153.752  |           |
| 1446.672    | 401.788     | 19522.269 | 35992.396 |           | 601.763     | 23265.723 | 29886.497 | 51089.218  | 69164.361  |           |
|             | 450.466     | 21456.936 | 36080.823 |           | 651.858     | 23272.502 | 29922.673 | 51141.855  | 69216.408  |           |
|             | 615.002     | 21456.975 | 36145.493 |           | 691.977     | 23300.300 | 29934.444 | 51145.89   | 69218.606  |           |
|             | 672.194     | 21582.118 | 36215.369 |           | 824.355     | 23322.726 | 29992.256 | 51151.936  | 69233.025  |           |
|             | 726.733     | 21582.795 | 36241.655 |           | 827.686     | 23339.416 | 31093.801 | 51205.662  | 69288.612  |           |
|             | 895.595     | 21688.910 | 36270.379 |           | 7005.014    | 23421.236 | 31125.173 | 51327.628  | 69306.331  |           |
|             | 956.784     | 21690.786 | 39586.109 |           | 7013.050    | 23835.565 | 31129.121 | 51396.802  | 70268.345  |           |
|             | 14403.111   | 21831.121 | 39590.237 |           | 7112.689    | 23887.802 | 31204.641 | 51415.181  | 70499.299  |           |
|             | 14734.413   | 21834.094 | 39803.163 |           | 7165.037    | 23942.378 | 31205.201 | 51458.536  | 70527.105  |           |
|             | 14766.227   | 21959.135 | 39859.411 |           | 7196.146    | 24011.402 | 31340.838 | 51462.538  | 70639.890  |           |
|             | 14809.129   | 21980.401 | 39882.011 |           | 7198.853    | 24030.939 | 31342.316 | 51498.0774 | 70706.402  |           |
|             | 14811.149   | 22041.502 | 39888.904 |           | 7374.727    | 24094.249 | 31375.361 | 51527.379  | 70867.823  |           |
|             | 14878.721   | 22074.285 | 39965.400 |           | 31320.037   | 24098.702 | 31381.678 | 51550.639  | 70883.579  |           |
|             | 15003.502   | 22121.090 | 39992.668 |           | 31538.943   | 24162.167 | 31392.172 | 51579.215  | 76405.016  |           |
|             | 15019.872   | 22141.401 | 40031.896 |           | 32012.204   | 24163.039 | 31407.932 | 51611.727  | 76432.741  |           |
|             | 22662.634   | 22160.392 | 40075.615 |           | 22421.437   | 26745.507 | 33884.037 | 51619.933  | 76768.034  |           |
|             | 22695.971   | 26263.962 | 40094.173 |           | 22447.856   | 26774.732 | 34018.983 | 51638.116  | 76854.080  |           |
|             | 22972.657   | 26311.591 | 40667.635 |           | 22496.000   | 26834.642 | 34036.770 | 51815.420  | 76977.846  |           |
|             | 23029.741   | 26343.783 | 40737.947 |           | 22517.491   | 26838.707 | 34072.501 | 51816.864  | 78890.152  |           |
|             | 23054.219   | 26422.171 | 40941.329 |           | 22556.917   | 26864.840 | 34080.213 | 55519.211  | 78890.983  |           |
|             | 23120.301   | 26736.644 | 41036.575 |           | 22584.460   | 26885.164 | 34167.038 | 55519.362  | 78998.330  |           |
|             | 23207.083   | 26742.416 | 41201.458 |           | 22585.368   | 26908.541 | 34214.301 | 55586.616  | 79000.402  |           |
|             | 23272.981   | 26756.927 | 47996.109 |           | 22606.020   | 26920.954 | 34337.851 | 55586.676  | 79296.085  |           |
|             | 23370.334   | 26763.855 | 48057.898 |           | 22616.720   | 26946.108 | 34379.973 | 55759.635  | 79297.636  |           |
|             | 37099.275   | 34530.060 | 48095.550 |           | 22644.310   | 27005.564 | 34488.557 | 55760.764  | 79365.0704 |           |
|             | 37108.247   | 34530.471 | 48115.378 |           | 22659.428   | 27015.221 | 34528.403 | 55863.770  | 79372.288  |           |
|             | 37460.867   | 34733.382 | 48243.969 |           | 22669.497   | 27048.222 | 34585.656 | 55864.430  | 79414.504  |           |
|             | 37695.516   | 34735.071 | 48265.552 |           | 22677.449   | 27073.401 | 39132.907 | 55907.36   | 79444.059  |           |
|             | 37827.824   | 34823.796 | 48275.402 |           | 22687.172   | 27233.093 | 39170.606 | 55909.713  | 79469.805  |           |
|             | 14651.753   | 34842.313 | 60736.554 |           | 22728.064   | 27234.450 | 39261.474 | 55930.012  | 79610.031  |           |
|             | 14661.263   | 34884.762 | 60737.579 |           | 22739.981   | 28193.402 | 39343.779 | 55960.819  | 79623.654  |           |
|             | 14675.204   | 34944.081 | 60906.553 |           | 22791.015   | 28203.162 | 39428.200 | 55980.014  | 88449.103  |           |
|             | 14676.532   | 34954.178 | 60923.630 |           | 22811.658   | 28206.369 | 39499.757 | 56075.580  | 88467.559  |           |
|             | 14686.250   | 35033.504 | 61066.477 |           | 22900.464   | 28214.978 | 39918.091 | 56081.073  | 88638.576  |           |
|             | 14694.196   | 35044.819 | 61106.060 |           | 22934.262   | 28225.074 | 40548.181 | 60092.489  | 88703.137  |           |
|             | 14710.902   | 35056.498 | 61143.289 |           | 22939.024   | 28267.986 | 40548.963 | 60549.970  | 89002.779  |           |
|             | 14728.613   | 35075.813 | 61273.048 |           | 22966.484   | 28268.688 | 40777.571 | 60781.694  | 89009.982  |           |
|             | 14733.075   | 35216.958 | 61343.121 |           | 22970.911   | 28274.822 | 40782.231 | 65197.910  | 89097.043  |           |
|             | 14788.259   | 35224.252 | 86573.023 |           | 23004.627   | 28284.219 | 40800.368 | 65422.266  | 94957.645  |           |
|             | 14794.040   | 35425.474 | 86589.332 |           | 23128.001   | 28312.326 | 40802.699 | 65543.165  | 94964.192  |           |
|             | 19204.996   | 35426.842 | 87043.157 |           | 23151.941   | 28314.544 | 40820.710 | 65984.012  | 95210.475  |           |
|             | 19219.485   | 35539.053 | 87229.184 |           | 23155.093   | 28331.420 | 40839.421 | 66019.617  | 95230.049  |           |

**Table S7.** The CASSCF computed energy (cm<sup>-1</sup>) of the spin-free states for complexes **5<sub>Tb</sub>** and **6<sub>Dy</sub>**. The red values represent the 7 septets (for Tb) and 21 sextets (for Dy) and respectively. The grey values represent 140 quintets (for Tb) and 224 quartets respectively.

| <b>5<sub>Tb</sub></b> |            |            |            | <b>6<sub>Dy</sub></b> |           |           |           |           |
|-----------------------|------------|------------|------------|-----------------------|-----------|-----------|-----------|-----------|
| 0.000                 | 270630.634 | 285579.395 | 324813.489 | 0.000                 | 25658.897 | 31495.171 | 45654.433 | 77965.362 |
| 48.328                | 274206.933 | 285775.043 | 325768.964 | 3.630                 | 25668.016 | 31496.828 | 45655.238 | 77971.553 |
| 271.843               | 274299.415 | 287543.910 | 325881.208 | 142.390               | 25676.457 | 31520.508 | 45867.109 | 77988.829 |
| 411.483               | 274479.028 | 287620.772 |            | 190.297               | 25688.302 | 31520.568 | 45867.166 | 77995.566 |
| 486.583               | 274605.801 | 288330.431 |            | 202.369               | 25716.352 | 33248.833 | 57779.330 | 78000.698 |
| 542.511               | 274654.876 | 290182.548 |            | 216.530               | 25756.141 | 33304.572 | 57796.134 | 78021.264 |
| 1010.497              | 274669.450 | 290230.850 |            | 421.906               | 25763.995 | 33311.185 | 57818.072 | 78024.903 |
| 261267.409            | 274684.937 | 290282.483 |            | 506.875               | 25777.133 | 33342.434 | 57829.818 | 78093.657 |
| 261282.620            | 274738.431 | 290386.989 |            | 543.108               | 25782.752 | 33378.466 | 57892.100 | 78094.077 |
| 261308.936            | 274810.412 | 290588.406 |            | 698.673               | 25955.655 | 34724.483 | 57904.244 | 78119.045 |
| 261421.096            | 274834.536 | 290650.569 |            | 704.465               | 25955.663 | 34732.733 | 57915.068 | 78120.484 |
| 261470.546            | 274924.917 | 290774.031 |            | 7616.940              | 26471.073 | 34757.201 | 57961.417 | 79425.596 |
| 264300.599            | 274982.185 | 291000.793 |            | 7753.389              | 26474.010 | 34760.167 | 57963.479 | 79433.173 |
| 264334.371            | 275047.014 | 291050.321 |            | 7773.030              | 26612.553 | 34773.565 | 58076.444 | 79544.187 |
| 264348.086            | 275073.189 | 291234.706 |            | 7805.886              | 26628.962 | 34796.172 | 58083.663 | 79597.969 |
| 264437.847            | 275112.345 | 291286.278 |            | 7840.754              | 26648.716 | 34881.561 | 58201.281 | 79770.090 |
| 264495.617            | 275181.674 | 300420.273 |            | 7909.582              | 26658.163 | 34891.351 | 58211.731 | 79786.722 |
| 264519.885            | 275220.860 | 306151.911 |            | 7917.740              | 26747.536 | 34952.777 | 58272.167 | 79908.965 |
| 264552.971            | 275350.406 | 306212.275 |            | 34734.280             | 26785.125 | 34958.611 | 58287.937 | 86171.052 |
| 264642.417            | 275405.151 | 306299.040 |            | 35251.745             | 26792.647 | 34964.897 | 58292.381 | 86278.693 |
| 264703.351            | 275412.639 | 306348.425 |            | 35413.120             | 29795.873 | 37860.334 | 58307.400 | 86377.915 |
| 264734.703            | 279233.968 | 306359.679 |            | 24987.800             | 29796.060 | 37974.464 | 58336.405 | 86733.878 |
| 264844.219            | 279235.624 | 306385.528 |            | 24989.421             | 29883.717 | 38053.716 | 58388.930 | 86742.015 |
| 264919.034            | 279570.142 | 306461.670 |            | 25011.461             | 29913.378 | 38066.903 | 58424.330 | 89079.801 |
| 264972.789            | 279621.169 | 306606.103 |            | 25011.863             | 29938.117 | 38077.241 | 62819.352 | 89099.276 |
| 265027.425            | 279662.672 | 306627.796 |            | 25114.309             | 29939.010 | 38129.647 | 62821.528 | 89181.371 |
| 265051.535            | 279681.726 | 306684.672 |            | 25121.452             | 29979.895 | 38167.830 | 62866.091 | 89204.200 |
| 265125.070            | 279782.149 | 306721.596 |            | 25156.234             | 30000.550 | 38204.058 | 62878.717 | 89220.652 |
| 265140.028            | 279881.351 | 306889.188 |            | 25160.676             | 30009.700 | 38362.398 | 62889.272 | 89259.986 |
| 265702.503            | 279907.375 | 306918.109 |            | 25194.131             | 30024.702 | 38365.522 | 62922.730 | 89268.823 |
| 265789.769            | 279985.522 | 308222.617 |            | 25201.200             | 30046.766 | 38406.942 | 62926.894 | 89380.467 |
| 266004.328            | 280051.115 | 308443.731 |            | 25252.766             | 30067.188 | 38415.652 | 62996.232 |           |
| 266031.297            | 280080.494 | 308483.416 |            | 25258.569             | 30087.679 | 43665.886 | 62996.997 |           |
| 266148.313            | 280104.559 | 308961.862 |            | 25272.876             | 30125.904 | 43897.790 | 63092.748 |           |
| 266212.228            | 280193.059 | 308994.330 |            | 25295.723             | 30133.895 | 43929.375 | 63093.670 |           |
| 266281.497            | 280228.534 | 309014.213 |            | 25385.280             | 31375.099 | 44030.038 | 63243.087 |           |
| 266321.454            | 283450.523 | 309062.062 |            | 25390.552             | 31375.742 | 44072.802 | 63243.228 |           |
| 266522.090            | 283491.672 | 321993.386 |            | 25426.541             | 31407.827 | 44143.519 | 63291.294 |           |
| 269839.440            | 283556.504 | 322360.307 |            | 25454.899             | 31407.853 | 44170.638 | 63291.412 |           |
| 269884.566            | 283644.063 | 322669.792 |            | 25482.274             | 31414.517 | 45417.906 | 68011.154 |           |
| 270039.214            | 283713.206 | 322808.456 |            | 25487.415             | 31416.090 | 45421.853 | 68140.652 |           |
| 270121.745            | 283851.802 | 322892.729 |            | 25492.497             | 31435.481 | 45475.652 | 68615.474 |           |
| 270226.219            | 283911.402 | 323097.551 |            | 25499.524             | 31437.296 | 45485.343 | 73752.173 |           |
| 270260.362            | 284005.377 | 323136.880 |            | 25536.273             | 31449.292 | 45525.134 | 73754.815 |           |
| 270470.389            | 284019.460 | 324209.614 |            | 25536.297             | 31449.358 | 45540.706 | 74160.686 |           |
| 270493.561            | 285042.371 | 324316.973 |            | 25555.864             | 31462.904 | 45551.941 | 74282.685 |           |
| 270523.597            | 285120.981 | 324555.748 |            | 25565.425             | 31468.184 | 45586.789 | 74343.207 |           |
| 270573.178            | 285457.510 | 324654.772 |            | 25573.292             | 31480.255 | 45588.312 | 77855.474 |           |

**Table S8.** The CASSCF+SO-RASSI computed energy (cm<sup>-1</sup>) of the low lying spin-orbit states for complexes **2-Ce** - **6-Dy**.

| <b>2-Ce</b> | <b>3-Nd</b> | <b>4-Sm</b> | <b>5-Tb</b> | <b>6-Dy</b> |
|-------------|-------------|-------------|-------------|-------------|
| 0.000       | 0.000       | 0.000       | 0.000       | 0.000       |
| 0.000       | 0.000       | 0.000       | 0.002       | 0.000       |
| 363.848     | 31.601      | 170.662     | 176.983     | 136.044     |
| 363.848     | 31.601      | 170.662     | 177.018     | 136.044     |
| 583.385     | 148.954     | 417.211     | 331.466     | 167.033     |
| 583.385     | 148.954     | 417.211     | 334.729     | 167.033     |
|             | 403.028     |             | 407.565     | 227.976     |
|             | 403.028     |             | 426.637     | 227.976     |
|             | 428.000     |             | 450.353     | 343.738     |
|             | 428.000     |             | 468.715     | 343.738     |
|             |             |             | 488.660     | 439.811     |
|             |             |             | 624.680     | 439.811     |
|             |             |             | 628.180     | 512.536     |
|             |             |             |             | 512.536     |
|             |             |             |             | 580.605     |
|             |             |             |             | 580.605     |

**Table S9.** SINGLE\_ANISO computed wave function decomposition analysis for Ln(III) in complex **2-Ce** - **6-Dy**. The major dominating values are kept in bold.

| $\pm m_J$   | <i>wave function decomposition analysis</i>                                                                 |
|-------------|-------------------------------------------------------------------------------------------------------------|
| <b>2-Ce</b> |                                                                                                             |
| KD1         | <b>97.7%</b> $ \pm 5/2\rangle$ + 1.2% $ \pm 1/2\rangle$ + 0.039% $ \pm 3/2\rangle$                          |
| KD2         | <b>44.1%</b> $ \pm 3/2\rangle$ + 12.37% $ \pm 1/2\rangle$ + 0.5% $ \pm 5/2\rangle$                          |
| KD3         | <b>58.7%</b> $ \pm 1/2\rangle$ + 26.4% $ \pm 3/2\rangle$ + 0.75.% $ \pm 5/2\rangle$                         |
| <b>3-Nd</b> |                                                                                                             |
| KD1         | <b>47.9%</b> $ \pm 7/2\rangle$ + 24.3% $ \pm 9/2\rangle$ + 22.2% $ \pm 5/2\rangle$ + 3.3% $ \pm 1/2\rangle$ |
| KD2         | <b>46.9%</b> $ \pm 9/2\rangle$ + 25.3% $ \pm 5/2\rangle$ + 15.3% $ \pm 3/2\rangle$ + 5.4% $ \pm 1/2\rangle$ |
| KD3         | <b>40.0%</b> $ \pm 3/2\rangle$ + 32.9% $ \pm 1/2\rangle$ + 7.9% $ \pm 7/2\rangle$ + 6.5% $ \pm 5/2\rangle$  |
| KD4         | <b>19.7%</b> $ \pm 5/2\rangle$ + 16.4% $ \pm 7/2\rangle$ + 9.1% $ \pm 1/2\rangle$ + 8.7% $ \pm 3/2\rangle$  |
| KD5         | <b>37.9%</b> $ \pm 1/2\rangle$ + 25.1% $ \pm 9/2\rangle$ + 23.7% $ \pm 3/2\rangle$ + 1.8% $ \pm 5/2\rangle$ |
| <b>4-Sm</b> |                                                                                                             |
| KD1         | <b>35.1%</b> $ \pm 1/2\rangle$ + 29.2% $ \pm 3/2\rangle$ + 20.2% $ \pm 5/2\rangle$                          |
| KD2         | <b>36.8%</b> $ \pm 3/2\rangle$ + 35.7% $ \pm 5/2\rangle$ + 1.3% $ \pm 1/2\rangle$                           |
| KD3         | <b>31.8%</b> $ \pm 5/2\rangle$ + 18.5% $ \pm 3/2\rangle$ + 12.0% $ \pm 1/2\rangle$                          |
| <b>5-Tb</b> |                                                                                                             |

|             |                                                                   |
|-------------|-------------------------------------------------------------------|
| 1           | <b>50.0%</b>  ±6⟩ +0.7%  ±2⟩ +0.5%  ±3⟩ +0.2%  ±4⟩+0.1%  ±1⟩      |
| 2           | <b>49.5%</b>  ±5⟩ +3.1%  ±3⟩ +1.6%  ±4⟩ +1.2%  ±0⟩+0.8%  ±1⟩      |
| 3           | <b>49.0%</b>  ±4⟩ +6.8%  ±1⟩ +5.8%  ±3⟩ +2.1%  ±0⟩+1.5%  ±5⟩      |
| 4           | <b>31.5%</b>  ±2⟩ +26.3%  ±1⟩ +20.3%  ±3⟩ +8.5%  ±2⟩+2.6%  ±4⟩    |
| 5           | <b>28.9%</b>  ±3⟩ +19.6%  ±1⟩ +14.7%  0⟩ +14.2%  ±2⟩+0.09%  ±5⟩   |
| 6           | <b>45.6%</b>  ±1⟩ +22.6%  ±2⟩ +3.4%  ±3⟩ +0.2%  ±4⟩               |
| <b>6-Dy</b> |                                                                   |
| KD1         | <b>95.6%</b>  ±15/2⟩ + 1.7%  ±11/2⟩ + 1.1%  ±9/2⟩ + 0.4%  ±13/2⟩  |
| KD2         | <b>76.7%</b>  ±13/2⟩ + 10.2%  ±11/2⟩ + 10.0%  ±9/2⟩ + 2.7%  ±7/2⟩ |
| KD3         | <b>63.8%</b>  ±11/2⟩ + 17.1%  ±7/2⟩ + 3.8%  ±15/2⟩ + 1.4%  ±5/2⟩  |
| KD4         | <b>66.1%</b>  ±9/2⟩ + 15.5%  ±5/2⟩ + 12.9%  ±13/2⟩ + 2.8%  ±11/2⟩ |
| KD5         | <b>64.5%</b>  ±7/2⟩ + 18.5%  ±11/2⟩ + 7.5%  ±3/2⟩ + 2.1%  ±1/2⟩   |
| KD6         | <b>51.8%</b>  ±5/2⟩ + 5.0%  ±3/2⟩ + 4.8%  ±1/2⟩ + 3.1%  ±9/2⟩     |
| KD7         | <b>52.8%</b>  ±3/2⟩ + 12.1%  ±1/2⟩ + 8.0%  ±5/2⟩ + 3.5%  ±9/2⟩    |
| KD8         | <b>47.6%</b>  ±1/2⟩ + 10.1%  ±3/2⟩ + 4.2%  ±7/2⟩ + 0.3%  ±11/2⟩   |

**TableS10.** SINGLE\_ANISO computed crystal field parameter ( $B_k^q$ ) for  $2_{-Ce}$ - $6_{Dy}$ . The major components in the Table are in bold.

|          |          | $2_{-Ce}$        | $3_{Nd}$         | $4_{Sm}$         | $5_{Tb}$         | $6_{Dy}$         |
|----------|----------|------------------|------------------|------------------|------------------|------------------|
| <b>k</b> | <b>q</b> | $B_k^q$          | $B_k^q$          | $B_k^q$          | $B_k^q$          | $B_k^q$          |
| 2        | -2       | <b>-0.12E+02</b> | <b>0.28E+01</b>  | <b>0.15E+01</b>  | <b>-0.17E+01</b> | 0.15E-02         |
|          | -1       | <b>-0.27E+01</b> | <b>-0.34E+01</b> | <b>-0.11E+02</b> | -0.56E-01        | 0.78E-01         |
|          | 0        | <b>-0.28E+01</b> | <b>-0.21E+01</b> | 0.91E+00         | <b>-0.50E+01</b> | <b>-0.29E+01</b> |
|          | 1        | 0.17E+00         | <b>0.29E+01</b>  | 0.63E+00         | <b>0.35E+00</b>  | -0.13E-03        |
|          | 2        | <b>-0.44E+01</b> | 0.39E+00         | -0.34E+02        | -0.73E+00        | 0.11E+01         |
| 4        | -4       | 0.11E+00         | -0.29E-01        | -0.14E+00        | 0.60E-02         | 0.18E-04         |
|          | -3       | 0.51E+01         | -0.12E+00        | -0.79E+01        | 0.65E-01         | 0.32E-01         |
|          | -2       | 0.20E+01         | 0.31E-01         | -0.59E-01        | 0.29E-01         | 0.35E-04         |
|          | -1       | 0.11E+00         | 0.13E+00         | 0.20E+01         | 0.12E-02         | 0.42E-02         |
|          | 0        | -0.45E+01        | 0.89E-02         | 0.15E+00         | -0.33E-02        | 0.27E-02         |
|          | 1        | -0.18E-01        | -0.10E+00        | 0.476E-01        | -0.29E-02        | -0.26E-04        |
|          | 2        | 0.96E+00         | 0.36E-02         | -0.81+00         | 0.12E-01         | 0.12E-01         |
|          | 3        | -0.27E+01        | -0.25E+00        | -0.99E+00        | -0.20E-01        | -0.13E-03        |

|   |    |           |           |          |           |           |
|---|----|-----------|-----------|----------|-----------|-----------|
|   | 4  | -0.47E-01 | 0.58E-01  | 0.60E+00 | -0.64E-02 | -0.30E-02 |
| 6 | -6 |           | -0.11E-03 |          | 0.52E-06  | 0.23E-06  |
|   | -5 |           | 0.23E-01  |          | 0.59E-04  | -0.67E-04 |
|   | -4 |           | -0.64E-02 |          | -0.15E-03 | 0.14E-05  |
|   | -3 |           | -0.93E-02 |          | -0.50E-03 | -0.43E-03 |
|   | -2 |           | 0.87E-03  |          | -0.47E-03 | -0.95E-06 |
|   | -1 |           | 0.18E-01  |          | -0.39E-04 | -0.22E-04 |
|   | 0  |           | -0.16E-03 |          | 0.38E-04  | -0.34E-04 |
|   | 1  |           | -0.16E-01 |          | -0.48E-04 | -0.43E-06 |
|   | 2  |           | -0.52E-03 |          | -0.18E-03 | -0.36E-03 |
|   | 3  |           | -0.23E-01 |          | 0.14E-03  | 0.12E-05  |
|   | 4  |           | 0.14E-01  |          | 0.17E-03  | 0.19E-03  |
|   | 5  |           | -0.32E-02 |          | -0.59E-04 | -0.22E-06 |
|   | 6  |           | 0.23E-03  |          | -0.99E-04 | 0.52E-04  |

**Table S11.** SINGLE\_ANISO computed  $g$ -values, the angle of deviation ( $\theta$ ) from ground state  $g_{zz}$  orientation of low-lying Kramers doublet for Nd<sup>III</sup> and Sm<sup>III</sup> ions in complexes **3**<sub>-Nd</sub>-**4**<sub>-Sm</sub> and tunneling splitting  $\Delta_{tun}$  (for non KDs of Tb<sup>III</sup> in complex **5**<sub>-Tb</sub>) in cm<sup>-1</sup> respectively.

|                                                    |                          |                            |
|----------------------------------------------------|--------------------------|----------------------------|
| <b>2</b> <sub>-Ce</sub>                            |                          |                            |
| $\pm m_J$ states (from 7 Doublets)                 | $g_{xx}; g_{yy}; g_{zz}$ | $\theta$ ( $^\circ$ angle) |
| 0.000                                              | 0.0758; 0.1306; 4.0888   | 0.0                        |
| 363.828                                            | 1.0493; 1.2945; 3.4315   | 98.5                       |
| 583.392                                            | 0.1210; 0.9332; 3.5225   | 91.2                       |
| <b>3</b> <sub>-Nd</sub>                            |                          |                            |
| $\pm m_J$ states (from 35 Quartets + 112 Doublets) | $g_{xx}; g_{yy}; g_{zz}$ | $\theta$ ( $^\circ$ angle) |
| 0.000                                              | 0.151; 0.255; 4.865      | 0.0                        |
| 31.601                                             | 0.0226; 0.221; 5.892     | 141.5                      |
| 148.954                                            | 0.198; 0.594; 3.9097     | 79.5                       |
| 403.028                                            | 3.845; 3.213; 0.549      | 134.1                      |
| 428.000                                            | 0.271; 0.840; 5.135      | 125.4                      |
| <b>4</b> <sub>-Sm</sub>                            |                          |                            |
| $\pm m_J$ states (from 21 Sextets + 128 Quartets)  | $g_{xx}; g_{yy}; g_{zz}$ | $\theta$ ( $^\circ$ angle) |
| 0.000                                              | 0.857; 0.795; 0.103      | 0.0                        |
| 170.662                                            | 0.082; 0.116; 1.511      | 44.0                       |
| 417.211                                            | 0.036; 0.137; 2.038      | 97.2                       |
| <b>5</b> <sub>-Tb</sub>                            |                          |                            |

| $\pm m_J$ states (from 7 Septets + 140 Quintets) | $g_{xx}; g_{yy}; g_{zz}$ | $\Delta_{tun}$ |
|--------------------------------------------------|--------------------------|----------------|
| 0.000                                            | 0.000; 0.000; 17.999     | 0.002          |
| 176.983                                          | 0.000; 0.000; 14.756     | 0.030          |
| 331.466                                          | 0.000; 0.000; 11.359     | 3.260          |
| 407.565                                          | 0.000; 0.000; 12.211     | 19.070         |
| 450.353                                          | 0.000; 0.000; 4.850      | 18.362         |
| 624.680                                          | 0.000; 0.000; 17.426     | 3.260          |

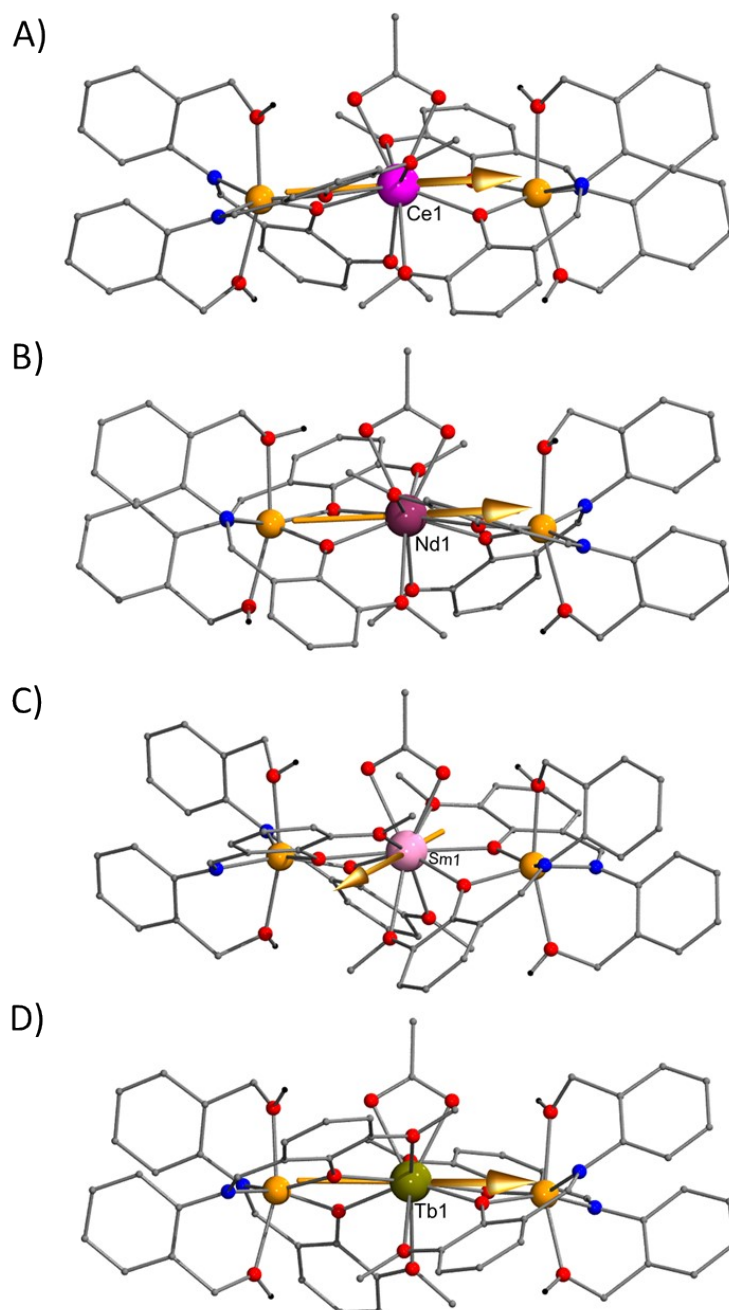

**Figure S7.** The orientation of computed ground state  $g_{zz}$  axis (A-D) in complexes **2-Ce-5**-**5-Tb** respectively



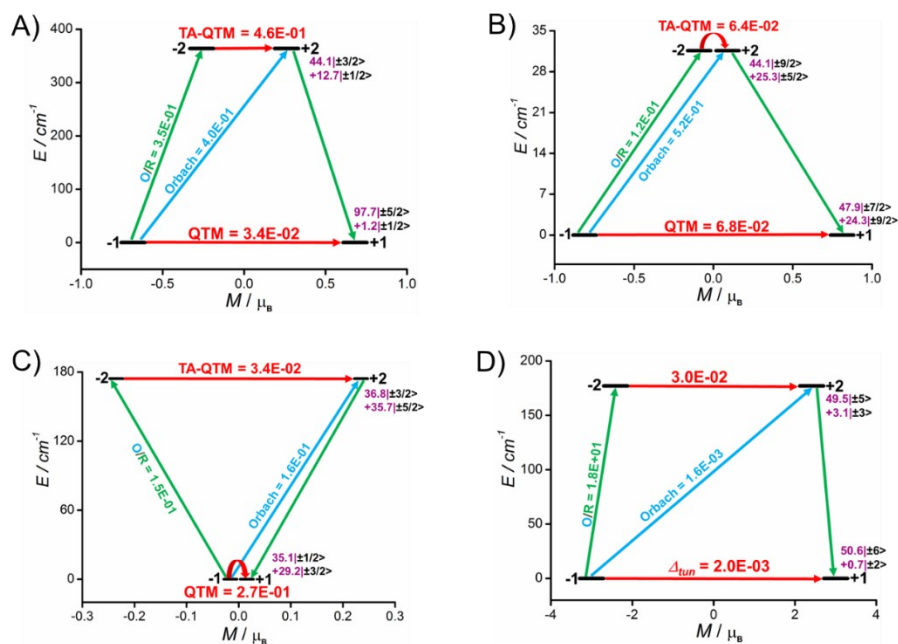

**Figure S8.** The computed magnetic relaxation mechanism (A-D) for complexes **2-Ce-5-Tb**.

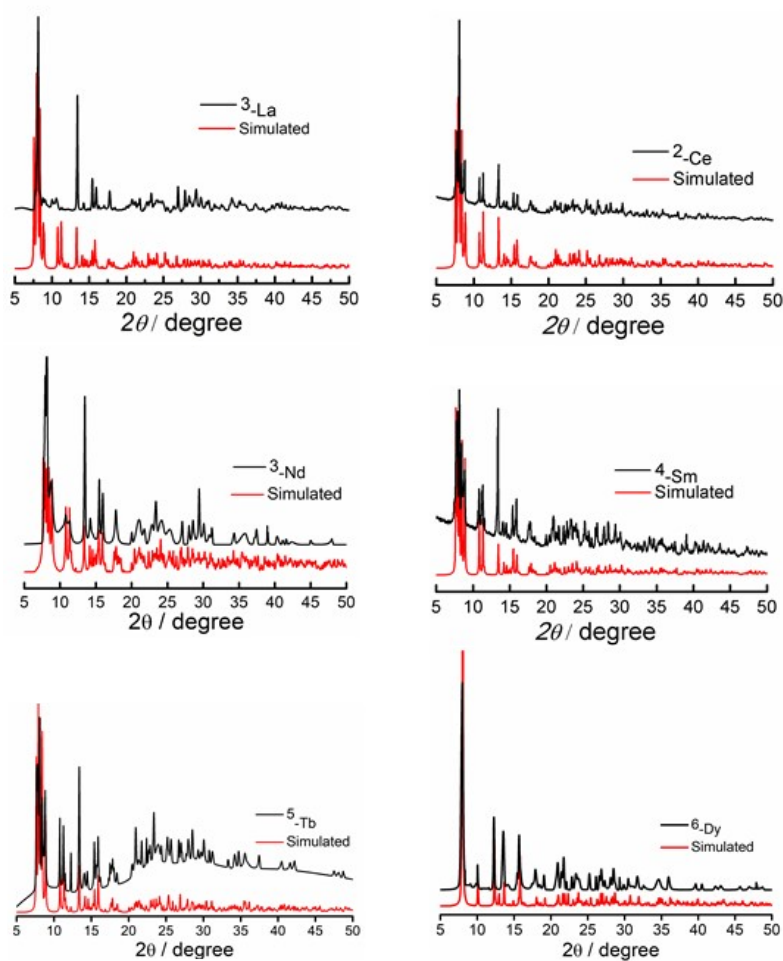

**Figure S9.** Powder X-ray of the complexes **1-La – 6-Dy**. The red solid line represent the simulated spectra and black solid line represents the experiment spectra.

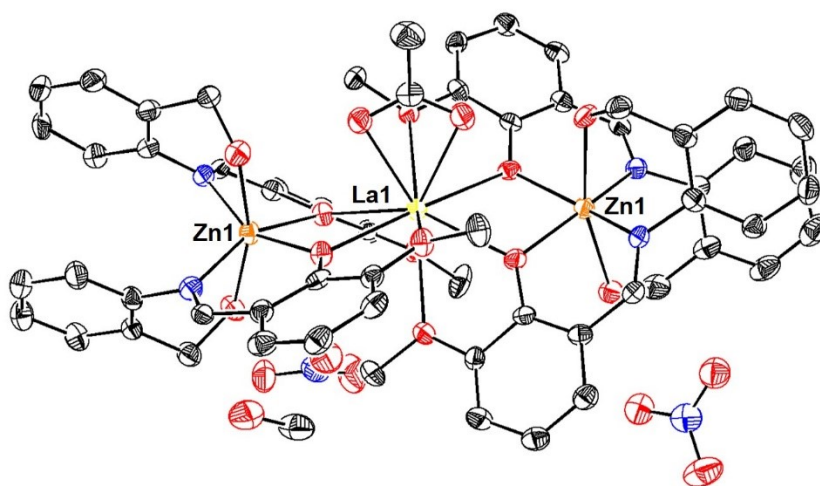

**Figure S10.** ORTEP diagram of complex **1<sub>La</sub>**, Color code: Red = oxygen, Blue = nitrogen, Black = Carbon, Yellow = lanthanum

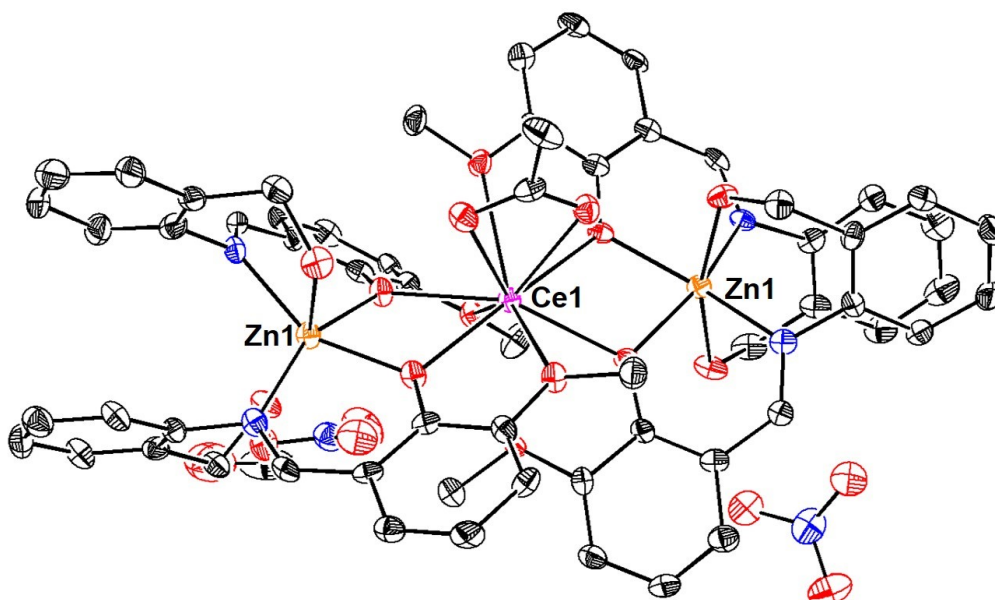

**Figure S11.** ORTEP diagram of complex **2<sub>Ce</sub>**, Color code: Red = oxygen, Blue = nitrogen, Black = Carbon, Magenta = Cerium

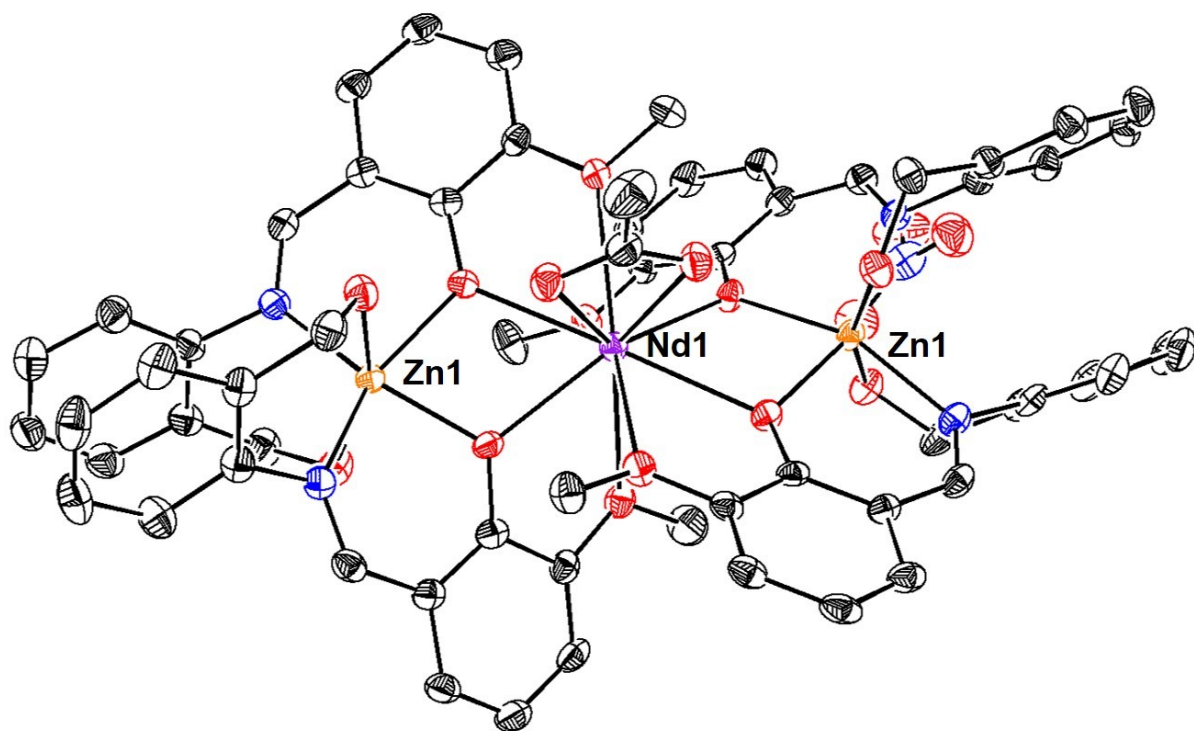

**Figure S12.** ORTEP diagram of complex  $3_{Nd}$ , Color code: Red = oxygen, Blue = nitrogen, Black = Carbon, Purple = Neodymium

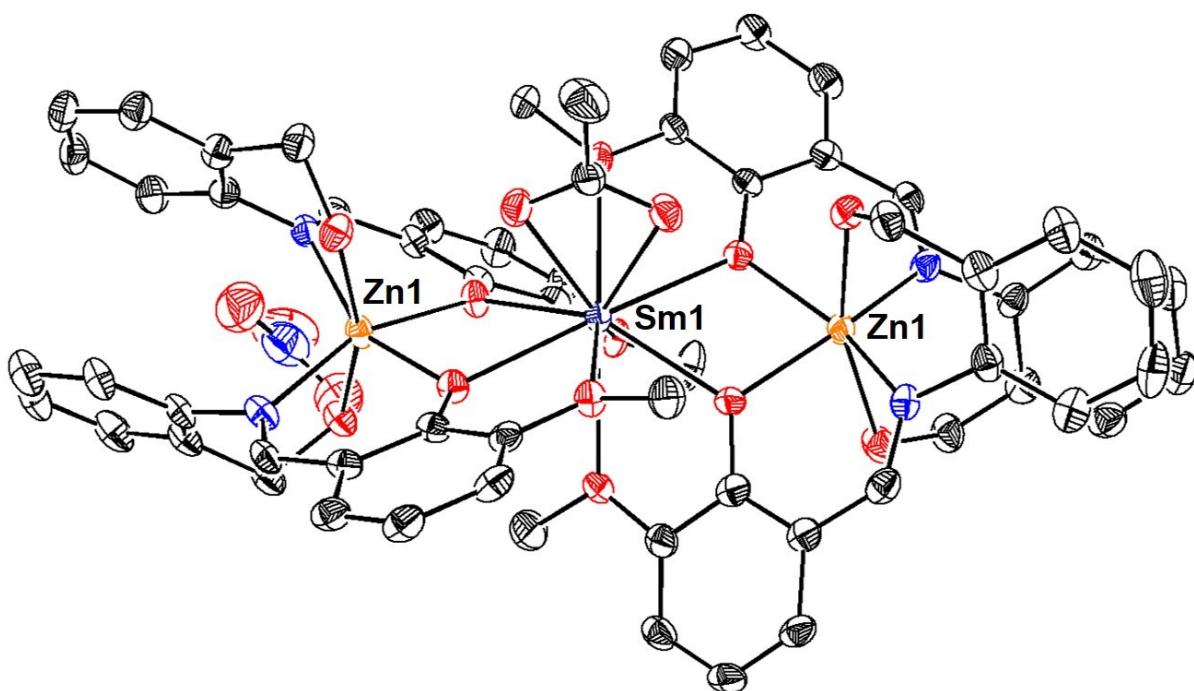

**Figure S13.** ORTEP diagram of complex  $4_{Sm}$ , Color code: Red = oxygen, Blue = nitrogen, Black = Carbon, Navy blue = Samarium

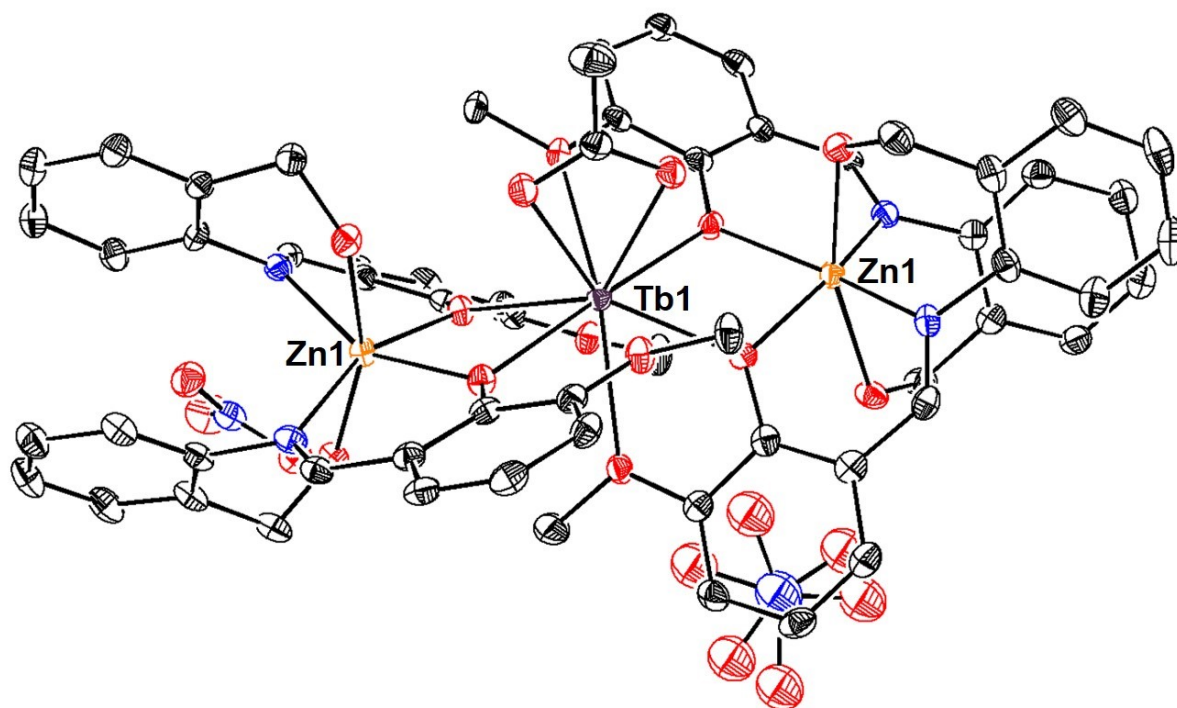

**Figure S14.** ORTEP diagram of complex  $5_{Tb}$ , Color code: Red = oxygen, Blue = nitrogen, Black = Carbon, Violet= Terbium

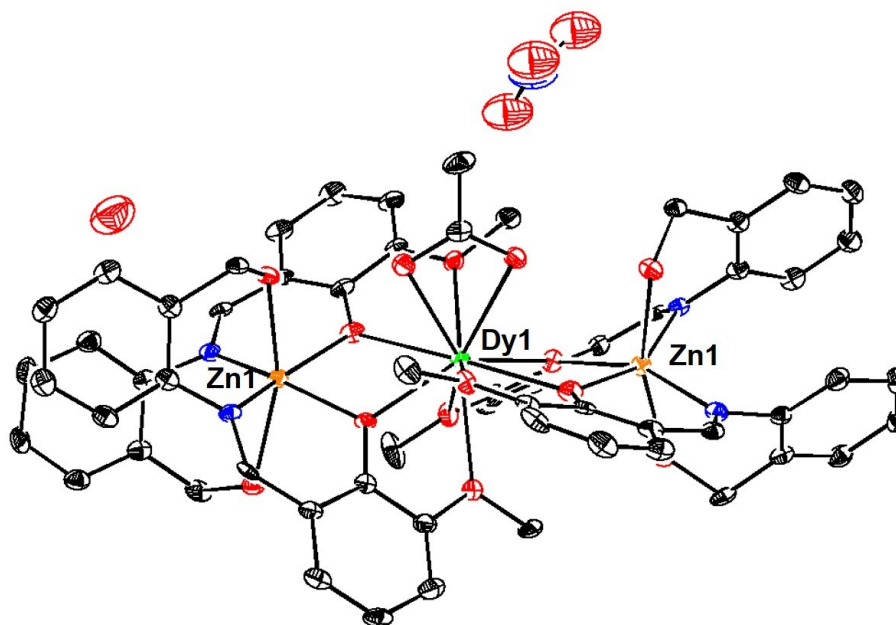

**Figure S15.** ORTEP diagram of complex  $6_{Dy}$ , Color code: Red = oxygen, Blue = nitrogen, Black = Carbon, Green = Dysprosium

## References

1. P.-Y. Shan, H.-F. Li, P. Chen, Y.-M. Tian, W.-B. Sun and P.-F. Yan, *Zeitschrift für anorganische und allgemeine Chemie*, 2015, 641, 1119-1124.
2. J. P. Costes, S. Titos-Padilla, I. Oyarzabal, T. Gupta, C. Duhayon, G. Rajaraman and E. Colacio, *Chemistry – A European Journal*, 2015, 21, 15785-15796.
3. W.-B. Sun, P.-F. Yan, S.-D. Jiang, B.-W. Wang, Y.-Q. Zhang, H.-F. Li, P. Chen, Z.-M. Wang and S. Gao, *Chemical Science*, 2016, 7, 684-691.
4. M. Li, H. Wu, Q. Wei, H. Ke, B. Yin, S. Zhang, X. Lv, G. Xie and S. Chen, *Dalton Transactions*, 2018, 47, 9482-9491.
5. P. Shukla, K. U. Ansari, C. Gao, S. Vaidya, S. Tripathi, P. Kumar, R. J. Butcher, J. Overgaard and M. Shanmugam, *Dalton Transactions*, 2020, 49, 10580-10593.
